# Supplementary material for: Identification of Land Use Function Bundles and Their Spatiotemporal Trade-Offs/Synergies: A Case Study in Jiangsu Coast, China
Source: MDPI journal article supplement (doi:10.3390/land11020286), 2022-02-13
Supplement: s1 [file s1]

Archive with 1 entries (1 files):
- land-1592270-supplementary.pdf
