# Supplementary material for: Identification of Land Use Function Bundles and Their Spatiotemporal Trade-Offs/Synergies: A Case Study in Jiangsu Coast, China
Source: MDPI journal article supplement (doi:10.3390/land11020286), 2022-02-13
Supplement: s1 [file s1 › land-1592270-supplementary.pdf]

# Supplementary Materials

## 1 Detailed description on the LUF quantification of this research

### 1.1 Provision of work

In this study, provision of work (PW) was used to describe the utilization of natural resources (agriculture) to support employment. PW indicates the number of agricultural employments provided for each grid. The main category involved in PW is cropland for agricultural production. Agricultural output was closely related with agricultural labor, and net primary productivity (NPP) was widely considered to represent the productivity of agricultural ecosystems (Peng *et al.*, 2017). Therefore, agricultural statistical yearbook data, cropland data, and NPP data were applied to spatially quantify PW. Owing to imbalances in agricultural production and employment intensity among different counties along the Jiangsu coast, we calculated the average agricultural employment density in each county by dividing the total agricultural employment-population by the total cropland. The area of cropland in each grid was then multiplied by the average agricultural employment density. Lastly, to account for spatial differences in agricultural employment population distributions in cropland with diversified productivity gradients, we used NPP data to modify the spatial distribution of PW. The detailed valuation formula is as follows (1):

$$PW_i = \frac{POP_x}{A_x} \times A_i \times \left( \frac{NPP_i}{NPP_x} + 1 \right) \quad (1)$$

Here,  $PW_i$  represents the agricultural employees of grid  $i$ .  $POP_x$  denotes the population of the primary industry for county  $x$ .  $A_x$  and  $A_i$  are the areas of agricultural land for county  $x$  and grid  $i$ , respectively.  $NPP_x$  and  $NPP_i$  are the net primary productivities of county  $x$  and grid  $i$ , respectively. The population of the primary industry for each county was obtained from the statistical yearbooks for Lianyungang, Yancheng, Nantong, which were downloaded from the China National Knowledge Infrastructure (CNKI, <https://www.cnki.net/>). The land use data for 2000, 2010, and 2018 were obtained from the Resource and Environmental Science Data Center (<http://www.resdc.cn>). The NPP data were calculated using the CASA model, and details are shown in the CR calculation portion.

### 1.2 Recreation

Recreation is defined as the regional potential for entertaining people, which is expressed by the influence of local natural and recreational attractions (Xu *et al.*, 2017). RE was comprehensively estimated according to the grade of the attraction and the distance from the attraction. According to the standards for rating the quality of tourist attractions in China, ordinal values of 9, 7, 5, and 3 were assigned to 5A-, 4A-, 3A-, and 2A-grade scenic spots. Ordinal values of 9, 7, 5, 3, and 1 were assigned to buffer areas with distances of 0 – 1 km, 1 – 5 km, 5 – 10 km, 10 – 20 km, and > 20 km from the tourist attractions (Xu *et al.*, 2017). Lists of tourist attractions are publicly available on city-level culture and tourism websites, and their positions are determined according to the Baidu Map API system

(<http://api.map.baidu.com/lbsapi/getpoint/>). We converted coordinate points into vector data to create multi-distance buffers and assigned values to different buffers according to the above rules. Using an overlay tool, RE maps were generated by summing all the assigned maps of the scenic spots (2000, 2010, 2018). Finally, the RE maps were converted into a grid format with a grid size of 1 km × 1 km. All steps were performed using ArcGIS 10.5 (Esri, 2017).

### 1.3 Culture

Culture (CU) referred to the pleasant experience provided by landscapes (Yu *et al.*, 2019). CU meant non-material benefit that is hard to estimate (Graves *et al.*, 2017). Therefore, we must establish uniform evaluation criteria to ensure that CU is comparable across landscapes. In this study, the method for assessing the value equivalent factor in unit area was used to quantify CU economic values (Graves *et al.*, 2017). This method first provides the value equivalents of various services for different ecosystems through quantifiable standards and then assesses the economic value of such services combined with the ecosystem in the area (Costanza *et al.*, 1997). CU evaluation primarily involves an integrated method for dynamic evaluation of the Chinese terrestrial ES, which combined the actual agricultural development over time (Xie *et al.*, 2015). Firstly, we collected the sown area and averaged the profit per unit area of rice, wheat, and corn to calculate the value of a standard unit ES value equivalent factor using Formula (2) (Xie *et al.*, 2015). In order to ensure that the CU economic value could be compared over time, the average profit per unit area was considered the comparable value (Year of 1952=100). Then, we extracted the land categories with the CU values (cropland, grassland, forest, water bodies, and wetland) from the land use data and determined the areas in each geographic grid. Finally, the spatial distribution of CU was corrected by regional grain yield indicators and equivalent factors using Formula (3) (Graves *et al.*, 2017).

$$D = \frac{1}{7} \times (S_r \times F_r + S_w \times F_w + S_c \times F_c) \quad (2)$$

$$CU_i = \frac{1}{7} \times \sum_{j=1}^5 A_{ij} \times U_i \times D \times k \quad (3)$$

Where  $CU_i$  is the total values for landscape aesthetics of grid  $i$  (Year of 1952 = 100),  $A_{xj}$  is area of  $j$  land-use types (cropland, grassland, forest, water bodies, and wetland) in grid  $i$ ,  $U_i$  is the equivalent factor (Gaodi, 2015).  $k$  is corrected factor, which equal, the ratio of grain yield per unit area in national- and city-levels,  $D_y$  is economic value of a standard unit ES value equivalent factor,  $S_r$ ,  $S_w$  and  $S_c$  are the sown area proportion of rice, wheat, and corn, respectively,  $F_r$ ,  $F_w$ , and  $F_c$  are the average net profit per unit area of rice, wheat, and corn in study area (1,952 = 100), respectively. Agricultural data were obtained from Statistical Yearbook in Lianyungang, Yancheng, Nantong, and “Compilation of national agricultural product cost benefit information”, downloaded from CNKI (<https://www.cnki.net/>).

Table 2 Landscape Aesthetics equivalent value per unit area

| Land use type | cropland | forest | grassland | wetland | water body |
|---------------|----------|--------|-----------|---------|------------|
| Value         | 0.06     | 1.06   | 0.56      | 4.73    | 1.89       |

## 1.4 Residential carrier& Economic support

Residential carrier (RC) refers to the provision of space for living, which is closely associated with population distribution (Liu *et al.*, 2018; Peng *et al.*, 2017). Economic support (ES) indicates the economic value generated by irreversible land use; therefore, build-up land (i.e., residential land and construction land mainly for mining and transportation) can provide ES (Liu *et al.*, 2018). Night lighting satellite data can sensitively detect the low-intensity lights emitted by small-scale residential lights, city lights, fires, and even traffic-produced light, which can comprehensively characterize the population distribution and economic activity (Henderson *et al.*, 2012). Therefore, the spatial modeling of RC and ES in this study combined the statistical, night light, and corresponding land-use data.

As for the RC, the total population of each county was allocated to the residential units according to the nighttime light intensity variation by the following equations:

$$RC_x = \frac{POP_j}{RA_j} \times RA_i \times \left(1 + \frac{RNL_i}{RNL_j}\right) \quad (4)$$

Where  $RC_x$  is population of grid i (Person).  $POP_j$  is population of county j.  $RA_i$  and  $RA_j$  are the area of residential land in grid i and county j.  $NL_i$  and  $NL_j$  are nighttime light value of residential land in grid i and county j, respectively.

As for the ES, the non-agricultural economic output values of each county were allocated to the build-up land units according to the nighttime light intensity variation by the following equations:

$$ES_i = \frac{GDP_{2j} + GDP_{3j}}{NL_j} \times NL_i \quad (5)$$

Where  $ES_i$  is non-agricultural economic output of grid i.  $GDP_{2j}$  and  $GDP_{3j}$  are the comparable output values of second and third industry for county j (Comparable value calculated based on the GDP of the corresponding industry in 1952).  $NL_i$  and  $NL_j$  are nighttime light value of residential land in grid i and county j, respectively.

The total population and output values of the second and third industry of each county were from the statistical yearbook in Lianyungang, Yancheng, Nantong that downloaded from CNKI (<https://www.cnki.net/>). The urban, rural settlements and construction land were extracted from land use data. The nightlight data came from DMSP/OLS (2000,2010) and NPP/VIIRS (2018) that were downloaded from National Centers for Environmental Information (NOAA, <https://ngdc.noaa.gov/eog/download.html>).

## 1.5 Food production

FP is the primary output of land for agricultural production activities, which implies that the terrestrial and freshwater ecosystems produced the desired products, which is a key function to fulfill basic human needs and guarantee food security (Liu *et al.*, 2018). Previous studies have aimed to quantify FP through food yields and economic value, but only few have focused on the output of nutrition for different foods (Peng *et al.*, 2017; Shen *et al.*, 2020; Yu *et al.*, 2019). Therefore, our research was based on the perspective of nutritional supply to evaluate regional food safety and supply potentials. FP was expressed through the yield of food calorie provided by agricultural land use (Wang *et al.*, 2011). Similar to the previous studies, different ecosystems contributed diversified types of food, including rice, wheat, corn, soybean, peanuts,

potato, and sugarcane produced on cropland; pork, beef, mutton, cow milk, poultry, and eggs produced on grassland; freshwater fish produced on waterbody (Shen *et al.*, 2020; Wang *et al.*, 2011). Considering the significant differences in production potential among different counties, the average grain yield of each county combined with the coefficient of food nutrient composition were used to calculate FP.

$$FP_i = \sum_{x=1}^3 \sum_{t=1}^{13} \frac{Y_{tj}}{A_{xtj}} \times A_{xti} \times E_t$$

Where  $FP_i$  is yield of food calorie in grid  $i$  (kcal).  $Y_{tj}$  is yield of food  $t$  in  $j$  county, from city-level Statistical Yearbook.  $A_{xtj}$  and  $A_{xti}$  are the area occupied by land use type  $x$  corresponding to food  $t$  in county  $j$  and grid  $i$ .  $E_t$  is calorie of food  $i$ , from “Ingredient list of Chinese food (2004)” (Yang, 2005).

Table 3 Calorie composition of different foods

| Food categories  | Calorie /kcal/100g |
|------------------|--------------------|
| rice             | 346                |
| wheat            | 317                |
| com              | 335                |
| soybean          | 359                |
| peanuts          | 298                |
| potato           | 329                |
| sugarcane        | 64                 |
| pork             | 395                |
| beef             | 106                |
| mutton           | 203                |
| cow milk         | 54                 |
| eggs             | 144                |
| fresh water fish | 103                |

## 1.6 Transport

Transport function (TR) refers to the convenience of interflow of goods, materials, and individuals (Liu *et al.*, 2018). In our research, TR was expressed as regional accessibility assessed by cumulative cost time of arriving to the nearest regional center (Jin *et al.*, 2009; Liu *et al.*, 2018). The time cost of a vehicle traveling per 1 km was assigned to the road grids according to different road. The time cost of railway, highway, national highway, and provincial and county roads were 0.6 min /km, 0.5 min/km, 0.75 min /km, 1 min /km, and 1.5 min /km, respectively (Liu *et al.*, 2018; Pan *et al.*, 2015). Considering the incomplete operations of highways and railways, the time cost of the 1km grid around highways and railways was 60 min /km. The time cost of the rest grids was 10 min /km, according by pedestrian walking speed (approximately 6km/h) (Jin *et al.*, 2009). Finally, the time cost grid and the residential land polygons were input into the tools of Cost Distance in ArcGIS 10.5, which generated the regional accessibility pattern. Jiangsu Road Data was obtained from Yangtze River Delta Science Data Center, National Earth System Science Data Sharing Infrastructure, and National Science & Technology Infrastructure of China (<http://nnu.geodata.cn:8008/>).

## 1.7 Water regulation

Our research quantitatively evaluated the function of water regulation (WR), which reflects the water yields of different land use systems and is one of the important LUFs supporting the global hydrological cycle (Fan *et al.*, 2018). The water yield model of Integrated Valuation of Ecosystem Services and Trade-offs (InVEST) software (3.1.3, <https://naturalcapitalproject.stanford.edu/>) was an estimation method based on the Budyko theory and water balance, which was widely applied to estimate grid-scale water yield (Sharp *et al.*, 2018). Based on this model, the water yields is the difference between precipitation and evaporation (Zhang *et al.*, 2014; Zhang *et al.*, 2019). In addition, the model also considered the spatial difference of soil permeability under different land use types and the influence of topography and surface roughness on surface runoff (Fan *et al.*, 2018; Zhang *et al.*, 2019). The model for evaluating WR is as follows (Sharp *et al.*, 2018):

$$WY_i = \left\{ 1 - \frac{AET(i)}{P(i)} \right\} \times P(i)$$

Where  $WY_i$  is annual water yield of grid  $i$ .  $AET(i)$  is evapotranspiration.  $P(i)$  is precipitation. The data requirements of the water yield model include: (1) Average Annual Precipitation, interpolated by precipitation of weather stations, which was download from National Meteorological Science Data Center (<http://data.cma.cn/>); (2) Root restricting layer depth was replaced by soil profile deep, from A China Dataset of Soil Properties for Land Surface Modeling (<http://data.casnw.net/portal/>) ; (3) Average Annual Reference Evapotranspiration, which was calculated by ET0 calculator 3.2 (FAO, <http://www.fao.org/nr/water/eto.html>); (4) Plant Available Water Content is field moisture capacity minus wilting coefficient, which is calculated by soil texture, bulk density and organic matter content according to (Zhou *et al.*, 2005) ; (5) Land use/land cover (Xu *et al.*, 2018) and Watersheds(Xu, 2018) are provided by Data Center for Resources and Environmental Sciences , Chinese Academy of Sciences (RESDC, <http://www.resdc.cn/>); (6) Biophysical parameters table referred to the Invest User Guide(Sharp *et al.*, 2018) and the research of and (Fu *et al.*, 2013; Gu *et al.*, 2018).

Table 4 Biophysical parameters for InVEST model

| Land-use type     | Evapotranspiration coefficient | root depth |
|-------------------|--------------------------------|------------|
| cropland          | 0.75                           | 300        |
| Forest            | 1                              | 5000       |
| Shrub forest      | 1                              | 2000       |
| Open forest       | 1                              | 3000       |
| Other forest      | 1                              | 700        |
| Grassland         | 0.65                           | 500        |
| Water body        | 1                              | 1          |
| wetland           | 1                              | 300        |
| ocean             | 1                              | 1          |
| Urban             | 0.3                            | 1          |
| Rural resident    | 0.3                            | 1          |
| Construction land | 0.3                            | 1          |
| Bare land         | 0.5                            | 1          |

## 1.8 Biodiversity conservation

BC provides habitat for individuals and communities. Habitat quality corresponds to ability of an ecosystem to provide survival and development conditions for a population, and, to a certain extent, it determines the level of regional biodiversity maintenance (Fan *et al.*, 2018; Shen *et al.*, 2020). Hence, for the quantification of BC, the habitat quality model in the InVEST software was used to determine the habitat quality of the Jiangsu coast. The information required by this model involve the threat degree of various sources, the distance and decay of such threats, and the sensitivity of each landscape type to threats (Liu *et al.*, 2018; Sharp *et al.*, 2018). The formula for evaluating BC is as follows:

$$Q_{xj} = H_j \left\{ 1 - \left( \frac{D_{xj}^z}{D_{xj}^z + k^z} \right) \right\}$$

Where  $Q_{xj}$  is the habitat quality at grid x of habitat j [0,1],  $D_{xj}$  is the threat level at grid x of habitat j,  $H_j$  is the habitat suitability of habitat j, z is set as 2.5, and k is the half saturation constant, which was set at 0.5. The data requirements of the habitat quality model include: (1) Land use/land cover (Xu *et al.*, 2018) (RESDC, <http://www.resdc.cn/>); (2) Threat sources data, which are GIS raster data that represent the spatial distribution and intensity of each threat, including urban, rural, industrial and mining land, rail, main road (i.e. expressway, national highway and provincial Highway), minor road (i.e. prefectural highway and country highway), aquaculture area, bare land, cropland in our study (Sharp *et al.*, 2018). Among them, Road data were extracted from the Jiangsu Road Data set (1990-2015, <http://nnu.geodata.cn:8008/>), while the remaining of the threats were extracted from land use data; (3) threat factors table including the relative impact of each kind of threat on the natural habitat and the distance at which habitat degradation occurs, which refers to the InVEST user's guide and previous studies (Sallustio *et al.*, 2017; Sun *et al.*, 2019) (see Table 5); (4) The Sensitivity table which contains information regarding the sensitivity of the LULC types belonging to the habitats to each threat, set empirically with reference to the InVEST user's guide and previous studies (Chu *et al.*, 2015; Sun *et al.*, 2019; Wu *et al.*, 2015) (see Table 6).

Table 5 Threat factors parameters for InVEST model

| THREAT                     | MAX_DIST | WEIGHT | DECAY       |
|----------------------------|----------|--------|-------------|
| Urban                      | 10       | 1      | Exponential |
| Rural                      | 9        | 0.9    | Exponential |
| Industrial and mining land | 5        | 0.9    | Exponential |
| Rail                       | 7        | 0.6    | linear      |
| Main road                  | 3        | 0.6    | linear      |
| minor road                 | 1        | 0.4    | linear      |
| aquaculture area           | 3        | 0.7    | Exponential |
| Bare land                  | 5        | 0.2    | linear      |
| Cropland                   | 8        | 0.7    | linear      |

Table 6 Sensitivity parameters for InVEST model

| LULC     | HABITAT | L_crop | L_urban | L_rural | L_indus | L_bare | L_rail | L_mainr | L_minor | L_aquic |
|----------|---------|--------|---------|---------|---------|--------|--------|---------|---------|---------|
| Forest   | 1       | 0.8    | 0.9     | 0.85    | 0.8     | 0.5    | 0.75   | 0.8     | 0.7     | 0.2     |
| Cropland | 0.4     | 0.2    | 0.8     | 0.75    | 0.6     | 0.5    | 0.6    | 0.7     | 0.6     | 0.5     |

|             |     |      |     |     |      |     |      |     |     |     |
|-------------|-----|------|-----|-----|------|-----|------|-----|-----|-----|
| Grassland   | 0.9 | 0.4  | 0.7 | 0.5 | 0.65 | 0.8 | 0.6  | 0.3 | 0.2 | 0.2 |
| Residential | 0   | 0    | 0   | 0   | 0    | 0   | 0.5  | 0.6 | 0.5 | 0.4 |
| Transport   | 0   | 0    | 0.7 | 0.7 | 0    | 0   | 0    | 0   | 0   | 0.3 |
| Industrial  | 0   | 0    | 0   | 0   | 0    | 0   | 0.5  | 0.6 | 0.5 | 0.4 |
| Wetland     | 1   | 0.5  | 0.8 | 0.8 | 0.9  | 0.5 | 0.75 | 0.7 | 0.6 | 0.9 |
| Water       | 0.9 | 0.75 | 0.9 | 0.8 | 0.95 | 0.4 | 0.75 | 0.7 | 0.5 | 0.6 |
| Aquiculture | 0.4 | 0.2  | 0.7 | 0.7 | 0.7  | 0.4 | 0.3  | 0.3 | 0.3 | 0.2 |
| Bare land   | 0.5 | 0.7  | 0.6 | 0.6 | 0.4  | 0   | 0.4  | 0.4 | 0.4 | 0.5 |

## 1.9 Climate regulation& Soil conservation

Our research quantified climate regulation (CR) and soil conservation (SC), both of which are important functions that affect the climate change and hydrological cycle. Carbon sequestration is the transformation process where inorganic carbon is incorporated into organic compounds through photosynthesis, which can significantly mitigate climate change and can be reflected by NPP (Fan *et al.*, 2018;Peng *et al.*, 2018;Shen *et al.*, 2020). The CR for a given cell can be expressed as:

$$CR = 1.63 * NPP$$

Where  $CR$  is the carbon sequestration of grid  $i$ , which is calculated from the NPP, and 1.63kg CO<sub>2</sub> is fixed by 1kg dry matter (Chen *et al.*, 2018). NPP were calculated through NPP evaluated module V1.0 developed by Zhou *et al.* (2005) and running on ENVI 5.3. The input data included: (1) Normalized Difference Vegetation Index (NDVI) is from terra product (MOD13Q1 , <https://e4ftl01.cr.usgs.gov/MOLT/MOD13Q1.006/>); (2) Vegetation types data comes from Land Cover Products of China (Ran *et al.*, 2010) (GLC2000, <http://data.casnw.net/portal/>); (3) Monthly average temperature, precipitation and solar radiation were average of five-year monthly data around 2000,2010,2018, which were download from National Meteorological Science Data Center (<http://data.cma.cn/>).

Soil conservation was the function of covering vegetation to prevent soil loss (Liu *et al.*, 2018). SC was assessed in sediment delivery ratio model in InVEST (3.1.3), which was equal to the potential soil loss under the non-vegetation scenario minus the actual soil loss (Peng *et al.*, 2017).

$$SC = RKLS - USLE$$

$$RKSL = R \times K \times L \times S$$

$$USLE = R \times K \times L \times S \times C \times P$$

Where  $SC$  is soil conservation per pixel.  $RKSL$  is potential soil erosion per pixel.  $USLE$  is soil loss per pixel.  $R$  is rainfall erosivity factor, which is calculated by Wischmeier formula (Wischmeier *et al.*, 1978).  $K$  is soil erodibility factor, which is calculated by EPIC model (Williams, 1990).  $L$  and  $S$  are slope length and steepness, and that are extracted by DEM (Geospatial Data Cloud, <http://www.gscloud.cn/>).  $C$  is land cover and management factor, calculated according to vegetation coverage (Cai *et al.*, 2000).  $P$  is support practice factor, its assignment refers to Hu *et al.* (2018).

## 2 Tables of this research

**Table S1. Changes and area proportion in LUMF and LUFs by trend types.**

| LUFs | Average increase<br>of improved<br>pixels | Proportion of<br>improved pixels | Average decrease of<br>deteriorated pixels | Proportion of<br>deteriorated pixels |
|------|-------------------------------------------|----------------------------------|--------------------------------------------|--------------------------------------|
| LUMF | 0.35                                      | 54.78                            | -0.30                                      | 34.89                                |
| BC   | 1.71                                      | 32.36                            | -1.78                                      | 28.78                                |
| CR   | 1.62                                      | 32.26                            | -1.70                                      | 30.75                                |
| ES   | 2.43                                      | 11.37                            | -2.08                                      | 5.81                                 |
| FP   | 1.96                                      | 24.37                            | -1.73                                      | 28.54                                |
| CU   | 1.82                                      | 17.31                            | -1.35                                      | 23.71                                |
| PW   | 1.42                                      | 22.49                            | -1.47                                      | 23.43                                |
| RC   | 2.03                                      | 26.87                            | -1.92                                      | 20.45                                |
| RE   | 1.36                                      | 39.68                            | -1.00                                      | 9.66                                 |
| SC   | 1.15                                      | 14.26                            | -1.16                                      | 14.05                                |
| TR   | 1.56                                      | 32.70                            | -1.34                                      | 25.61                                |
| WR   | 1.34                                      | 19.03                            | -1.38                                      | 18.46                                |

\* BC: biodiversity conservation; CR: climate regulation; ES: economic support; FP: food production; CU: culture; PW: provision of work; RC: residential carrier; RE: recreation; SC: soil conservation; TR: transport; WR: water regulation.

**Table S2. The diversity scores (number of effective LUFs) of each bundle in 2000, 2010 and 2018 respectively.**

| Year | LUFB1 | LUFB2 | LUFB3 | LUFB4 |
|------|-------|-------|-------|-------|
| 2000 | 7.96  | 8.80  | 6.78  | 8.98  |
| 2010 | 8.04  | 8.86  | 6.51  | 8.90  |
| 2018 | 7.90  | 8.86  | 6.37  | 8.79  |
| Mean | 7.97  | 8.84  | 6.55  | 8.89  |

**Table S3. The main trade-offs and synergies among LUFs in each cluster. Exploratory factor analysis is used to extract the main factors from the multiple-provided LUFs accompanied by the correlations among the provision of LUFs, that is, the trade-offs and synergies of LUFs. The analysis was tested using a KMO and Bartlett Spherical test ( $p < 0.01$ ). Factor loadings  $\geq 0.35$  are regarded as the vital components in each factor, and are shown in bold red.**

| Year | Bundles | Trade-offs and synergies           | The factor loadings of land use functions after rotation |             |             |              |              |             |             |              |              |              |              | Variance explained (%) | Cumulative variance |
|------|---------|------------------------------------|----------------------------------------------------------|-------------|-------------|--------------|--------------|-------------|-------------|--------------|--------------|--------------|--------------|------------------------|---------------------|
|      |         |                                    | BC                                                       | CR          | SC          | WR           | ES           | FP          | RC          | TR           | CU           | PW           | RE           |                        |                     |
| 2000 | LUFB1   | Trade-offs among CU, CR, PW and WR | -0.09                                                    | <b>0.41</b> | 0.27        | <b>0.78</b>  | 0.05         | 0.06        | -0.01       | 0.04         | <b>-0.75</b> | <b>0.70</b>  | -0.23        | 17.79                  | 17.79               |
|      |         | Trade-offs among BC, FP and RE     | <b>-0.39</b>                                             | -0.12       | -0.15       | 0.11         | -0.13        | <b>0.83</b> | -0.13       | -0.16        | 0.23         | 0.32         | <b>0.74</b>  | 15.00                  | 32.80               |
|      |         | Trade-off between BC and TR        | <b>-0.60</b>                                             | -0.23       | -0.06       | -0.04        | 0.13         | -0.21       | 0.10        | <b>0.80</b>  | -0.21        | 0.32         | 0.30         | 12.41                  | 45.21               |
|      |         | Trade-off between ES and RC        | 0.14                                                     | 0.27        | -0.10       | -0.01        | <b>-0.52</b> | -0.03       | <b>0.83</b> | 0.01         | -0.01        | -0.09        | 0.09         | 9.75                   | 54.95               |
|      | LUFB2   | Synergies among FP, PW and RE      | 0.31                                                     | 0.16        | 0.17        | 0.18         | 0.00         | <b>0.71</b> | -0.18       | -0.04        | -0.15        | <b>0.74</b>  | <b>0.61</b>  | 15.17                  | 15.17               |
|      |         | Trade-offs among WR, TR, BC and CU | <b>0.67</b>                                              | -0.03       | 0.04        | <b>-0.38</b> | -0.25        | 0.24        | 0.13        | <b>-0.57</b> | <b>0.56</b>  | -0.33        | 0.00         | 13.42                  | 28.60               |
|      |         | Synergies among CR, RC and WR      | 0.23                                                     | <b>0.56</b> | 0.02        | <b>0.44</b>  | -0.02        | 0.06        | <b>0.81</b> | 0.15         | 0.01         | -0.16        | 0.15         | 11.68                  | 40.28               |
|      |         | Trade-offs among WR, ES and SC     | 0.00                                                     | -0.04       | <b>0.74</b> | <b>-0.49</b> | <b>0.44</b>  | -0.01       | 0.04        | 0.28         | 0.04         | -0.07        | 0.25         | 10.30                  | 50.58               |
|      | LUFB3   | Synergies among CR, PW, RC and TR  | -0.05                                                    | <b>0.56</b> | -0.02       | -0.20        | -0.04        | 0.25        | <b>0.63</b> | <b>0.69</b>  | 0.15         | <b>0.71</b>  | 0.10         | 16.62                  | 16.62               |
|      |         | Synergy between BC and CU          | <b>0.88</b>                                              | -0.02       | -0.16       | -0.01        | -0.24        | 0.07        | 0.10        | 0.03         | <b>0.88</b>  | 0.00         | 0.09         | 14.98                  | 31.59               |
|      |         | Synergy between FP and WR          | 0.02                                                     | 0.30        | 0.18        | <b>0.75</b>  | -0.29        | <b>0.74</b> | -0.15       | -0.13        | 0.05         | 0.15         | -0.11        | 12.63                  | 44.22               |
|      |         | Synergy between RE and SC          | -0.11                                                    | 0.19        | <b>0.62</b> | 0.08         | 0.31         | -0.06       | -0.11       | 0.28         | 0.00         | -0.13        | <b>0.77</b>  | 11.36                  | 55.58               |
|      | LUFB4   | Synergies among FP, PW and WR      | 0.24                                                     | 0.23        | -0.28       | <b>0.82</b>  | 0.15         | <b>0.67</b> | 0.21        | 0.05         | -0.17        | <b>0.71</b>  | 0.23         | 17.85                  | 17.85               |
|      |         | Trade-offs among PW, BC, CU and RE | <b>0.71</b>                                              | -0.07       | -0.27       | 0.04         | -0.15        | 0.25        | <b>0.47</b> | -0.13        | <b>0.69</b>  | <b>-0.40</b> | -0.03        | 14.04                  | 31.89               |
|      |         | Trade-off between CR and ES        | 0.14                                                     | <b>0.75</b> | 0.23        | 0.03         | <b>-0.74</b> | 0.02        | 0.32        | -0.12        | -0.04        | 0.06         | -0.09        | 11.97                  | 43.85               |
|      |         | Trade-offs among RE, RC and TR     | -0.22                                                    | 0.05        | -0.28       | 0.03         | 0.07         | -0.12       | <b>0.47</b> | <b>0.69</b>  | 0.05         | -0.04        | <b>-0.62</b> | 11.18                  | 55.03               |
| 2010 | LUFB1   | Trade-offs among PW, WR, FP and CU | -0.03                                                    | 0.34        | 0.00        | <b>-0.36</b> | 0.03         | <b>0.69</b> | -0.10       | -0.01        | <b>0.84</b>  | <b>-0.71</b> | 0.29         | 18.42                  | 18.42               |
|      |         | Trade-offs among BC, RE, TR and WR | <b>-0.73</b>                                             | 0.07        | -0.02       | <b>0.52</b>  | 0.09         | 0.27        | -0.21       | <b>0.62</b>  | -0.09        | 0.13         | <b>0.47</b>  | 14.23                  | 32.65               |
|      |         | Synergies among CR, RC and WR      | 0.09                                                     | <b>0.57</b> | 0.05        | <b>0.43</b>  | 0.14         | 0.00        | <b>0.72</b> | -0.08        | -0.11        | -0.23        | 0.14         | 10.49                  | 43.14               |

|             |       |                                            |             |              |              |              |              |              |             |              |              |             |             |       |       |
|-------------|-------|--------------------------------------------|-------------|--------------|--------------|--------------|--------------|--------------|-------------|--------------|--------------|-------------|-------------|-------|-------|
|             |       | Trade-offs among ES, RE and SC             | 0.10        | 0.01         | <b>0.78</b>  | 0.07         | <b>-0.45</b> | -0.17        | -0.13       | -0.06        | 0.03         | -0.16       | <b>0.45</b> | 10.00 | 53.14 |
|             | LUFB2 | Trade-offs among WR, PW and RE             | -0.19       | -0.04        | 0.28         | <b>-0.66</b> | -0.01        | 0.13         | -0.17       | 0.31         | -0.05        | <b>0.57</b> | <b>0.76</b> | 14.54 | 14.54 |
|             |       | Trade-offs among CU, ES, RC and TR         | -0.01       | 0.17         | -0.04        | 0.07         | <b>0.53</b>  | 0.09         | <b>0.65</b> | <b>0.46</b>  | <b>-0.63</b> | -0.09       | 0.06        | 12.35 | 26.88 |
|             |       | Trade-offs among TR, FP and PW             | 0.16        | 0.05         | -0.17        | 0.03         | 0.20         | <b>0.81</b>  | 0.07        | <b>-0.42</b> | 0.08         | <b>0.52</b> | 0.11        | 11.19 | 38.07 |
|             |       | Synergy between BC and SC                  | <b>0.75</b> | 0.01         | <b>0.68</b>  | -0.09        | 0.04         | -0.02        | 0.11        | -0.13        | 0.13         | 0.00        | -0.06       | 9.86  | 47.93 |
|             |       | Trade-off between CR and ES                | -0.10       | <b>0.87</b>  | 0.11         | 0.14         | <b>-0.42</b> | -0.05        | 0.15        | -0.15        | -0.11        | 0.07        | 0.08        | 9.42  | 57.35 |
|             | LUFB3 | Trade-offs among ES, BC, CU and RE         | <b>0.85</b> | 0.07         | -0.14        | -0.14        | <b>-0.54</b> | 0.23         | 0.04        | 0.00         | <b>0.83</b>  | 0.00        | <b>0.43</b> | 18.07 | 18.07 |
|             |       | Synergies among CR, PW, RC and TR          | -0.03       | <b>0.53</b>  | 0.01         | 0.07         | -0.11        | 0.26         | <b>0.70</b> | <b>0.74</b>  | 0.03         | <b>0.54</b> | -0.07       | 15.33 | 33.40 |
|             |       | Synergies among FP, PW, RE and WR          | -0.07       | 0.29         | <b>0.53</b>  | <b>0.70</b>  | 0.04         | <b>0.50</b>  | -0.14       | 0.04         | -0.06        | <b>0.42</b> | <b>0.42</b> | 13.48 | 46.88 |
|             | LUFB4 | Trade-offs among ES, BC, CR and CU         | <b>0.64</b> | <b>0.60</b>  | 0.01         | 0.12         | <b>-0.66</b> | 0.04         | 0.26        | -0.26        | <b>0.65</b>  | 0.21        | -0.04       | 16.51 | 16.51 |
|             |       | Trade-offs among CU, SC, PW and WR         | 0.08        | 0.33         | <b>-0.49</b> | <b>0.77</b>  | -0.17        | -0.01        | 0.05        | 0.01         | <b>-0.40</b> | <b>0.61</b> | 0.03        | 13.71 | 30.22 |
|             |       | Synergy between RC and TR                  | 0.07        | 0.04         | -0.15        | 0.05         | 0.10         | 0.07         | <b>0.82</b> | <b>0.68</b>  | 0.04         | -0.22       | 0.00        | 11.29 | 41.51 |
|             |       | ----                                       | -0.10       | -0.23        | 0.01         | 0.12         | -0.06        | -0.01        | -0.09       | 0.12         | 0.24         | -0.11       | <b>0.95</b> | 9.84  | 51.36 |
|             |       | ----                                       | -0.01       | 0.18         | 0.19         | 0.04         | 0.08         | <b>0.92</b>  | -0.13       | 0.28         | 0.10         | 0.19        | 0.00        | 9.62  | 60.97 |
| <b>2018</b> | LUFB1 | Trade-offs among CR, FP, CU, BC, PW and WR | <b>0.39</b> | <b>-0.67</b> | 0.15         | <b>0.75</b>  | 0.05         | <b>-0.64</b> | -0.04       | 0.25         | <b>-0.80</b> | <b>0.72</b> | -0.13       | 25.73 | 25.73 |
|             |       | Synergy between BC and RC                  | <b>0.51</b> | 0.21         | -0.08        | 0.13         | -0.12        | -0.25        | <b>0.87</b> | 0.18         | -0.16        | -0.02       | -0.07       | 11.01 | 36.74 |
|             |       | Synergy between RE and TR                  | -0.16       | 0.09         | 0.32         | 0.26         | 0.10         | -0.08        | 0.06        | <b>0.47</b>  | 0.03         | -0.13       | <b>0.84</b> | 10.60 | 47.35 |
|             |       | Trade-offs among SC, ES and TR             | 0.18        | 0.03         | <b>0.66</b>  | 0.09         | <b>-0.62</b> | 0.09         | -0.04       | <b>-0.45</b> | 0.01         | 0.00        | 0.09        | 9.75  | 57.09 |
|             | LUFB2 | Trade-offs among WR, PW and RE             | 0.09        | 0.01         | 0.18         | <b>-0.68</b> | 0.14         | 0.25         | 0.09        | 0.01         | -0.12        | <b>0.75</b> | <b>0.75</b> | 15.80 | 15.80 |
|             |       | Trade-offs among FP, ES, RC and TR         | 0.06        | 0.09         | 0.01         | -0.18        | <b>0.40</b>  | <b>-0.66</b> | <b>0.45</b> | <b>0.70</b>  | -0.06        | -0.17       | 0.06        | 12.45 | 28.25 |
|             |       | Synergy between BC and CU                  | <b>0.78</b> | 0.03         | 0.07         | 0.10         | 0.06         | 0.01         | -0.28       | 0.01         | <b>0.76</b>  | 0.14        | -0.09       | 11.91 | 40.16 |
|             |       | Synergy between ES and SC                  | 0.12        | <b>0.72</b>  | <b>-0.61</b> | 0.07         | 0.15         | 0.32         | 0.23        | -0.01        | -0.14        | 0.07        | -0.18       | 10.48 | 50.64 |
|             | LUFB3 | Synergies among CR, PW, RC and TR          | 0.06        | <b>0.56</b>  | -0.06        | 0.01         | 0.00         | 0.13         | <b>0.68</b> | <b>0.78</b>  | -0.05        | <b>0.58</b> | 0.16        | 16.07 | 16.07 |
|             |       | Trade-offs among ES, BC and CU             | <b>0.75</b> | 0.12         | -0.14        | -0.20        | <b>-0.64</b> | 0.17         | 0.00        | -0.08        | <b>0.75</b>  | -0.03       | 0.09        | 14.98 | 31.04 |
|             |       | Synergy between FP and WR                  | -0.04       | 0.13         | 0.05         | <b>0.82</b>  | -0.22        | <b>0.77</b>  | -0.06       | -0.12        | -0.26        | 0.21        | 0.07        | 13.39 | 44.44 |

|  |       |                                    |             |             |              |             |              |             |             |             |             |             |             |       |       |
|--|-------|------------------------------------|-------------|-------------|--------------|-------------|--------------|-------------|-------------|-------------|-------------|-------------|-------------|-------|-------|
|  |       | Synergy between RE and SC          | -0.12       | -0.02       | <b>0.73</b>  | 0.00        | 0.04         | 0.15        | -0.07       | 0.18        | 0.13        | 0.09        | <b>0.74</b> | 10.80 | 55.24 |
|  | LUFB4 | Trade-offs among ES, CR, FP and CU | 0.23        | <b>0.58</b> | -0.05        | -0.14       | <b>-0.62</b> | <b>0.70</b> | 0.01        | -0.12       | <b>0.64</b> | 0.09        | -0.03       | 15.57 | 15.57 |
|  |       | Trade-offs among SC, BC, PW and WR | <b>0.64</b> | 0.18        | <b>-0.35</b> | <b>0.78</b> | -0.10        | 0.05        | 0.03        | -0.04       | -0.13       | <b>0.60</b> | 0.01        | 14.16 | 29.73 |
|  |       | Synergy between RC and TR          | 0.21        | 0.08        | -0.26        | -0.19       | 0.08         | -0.24       | <b>0.73</b> | <b>0.73</b> | 0.14        | -0.17       | -0.02       | 12.24 | 41.97 |
|  |       | ----                               | -0.03       | -0.25       | -0.05        | 0.10        | 0.31         | 0.12        | -0.07       | 0.07        | 0.31        | -0.31       | <b>0.88</b> | 10.54 | 52.51 |

3 Figures of this research

1: 2000

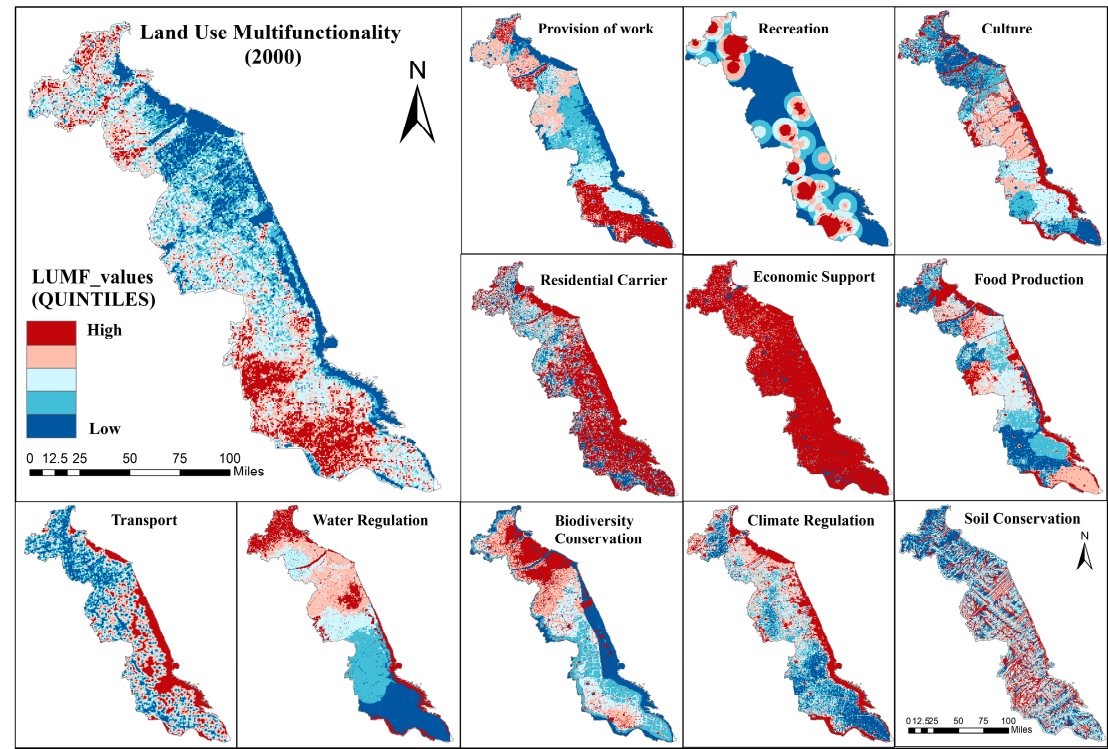

2: 2010

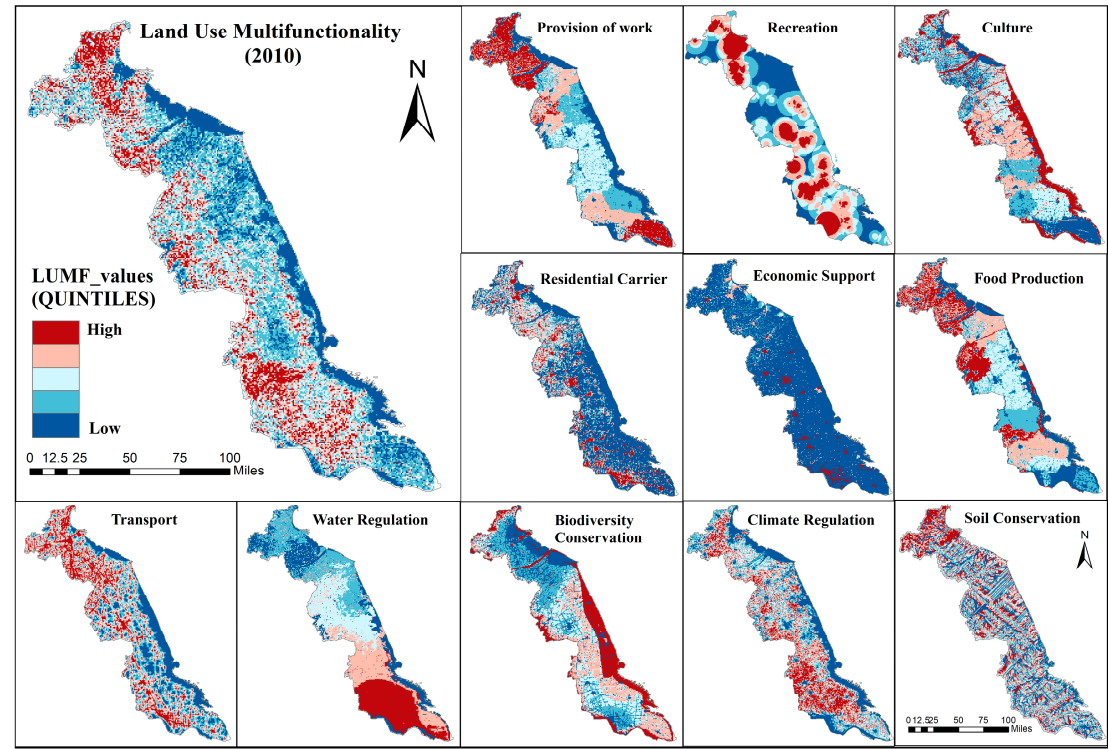

Figure S1. Spatial distribution of eleven land use functions in 2000 and 2010 by the quintiles.

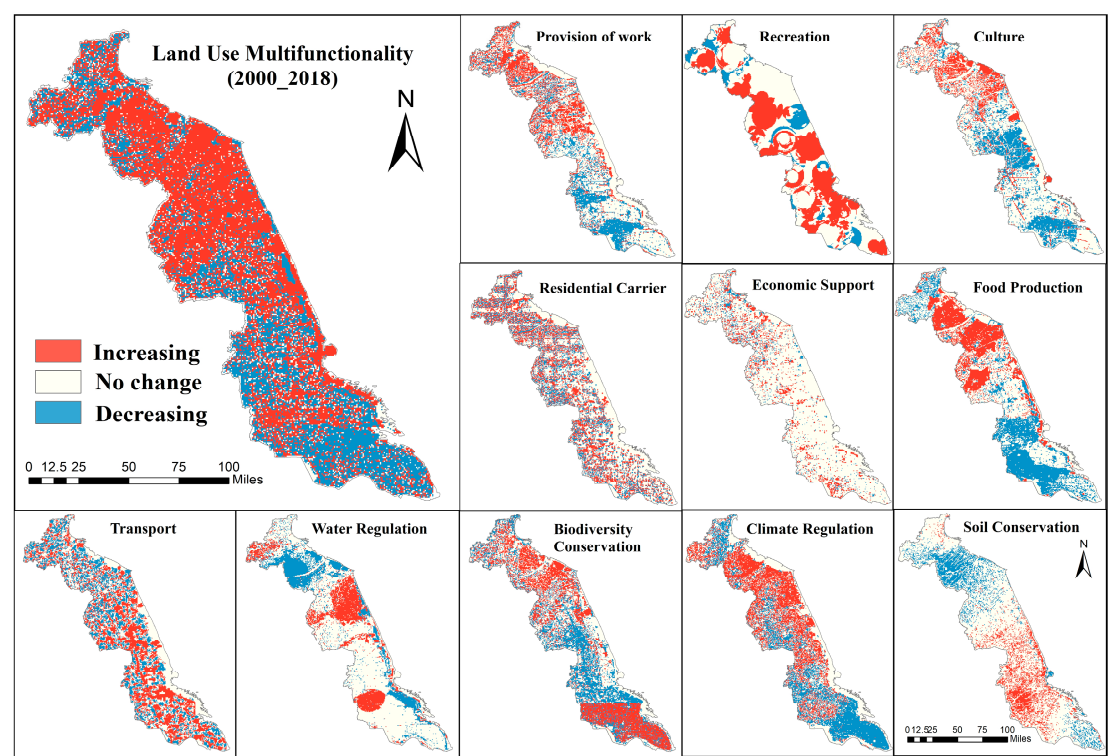

Figure S2. Map of trends in grid values of land use functions across the Jiangsu coastal area from 2000 to 2018.

## 1. 2000

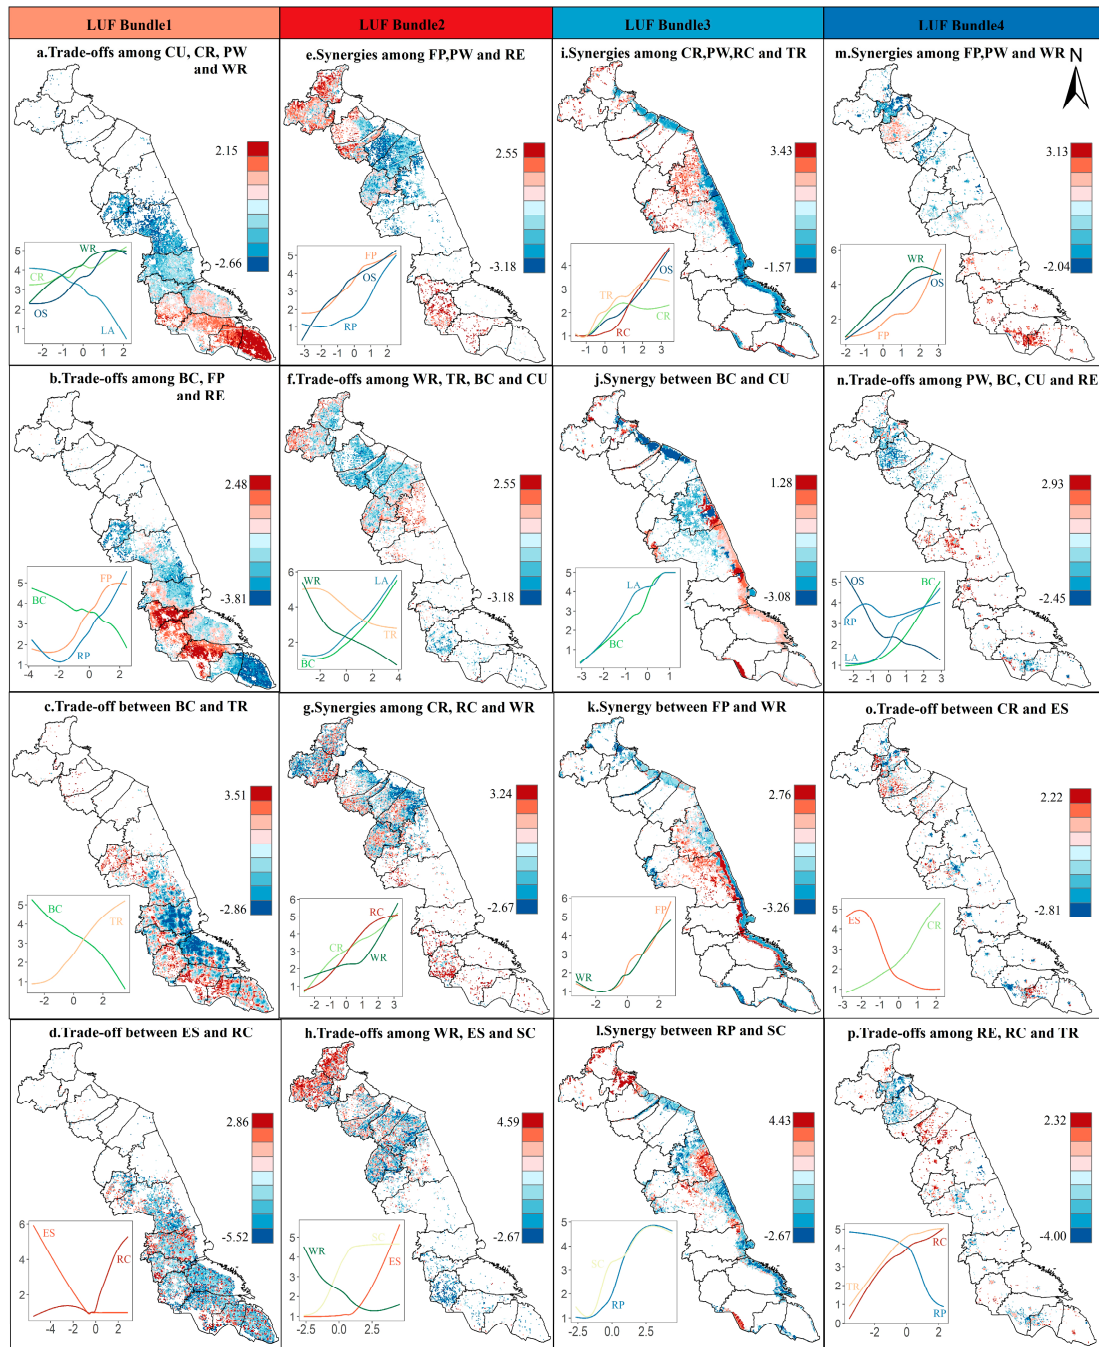

## 2. 2010

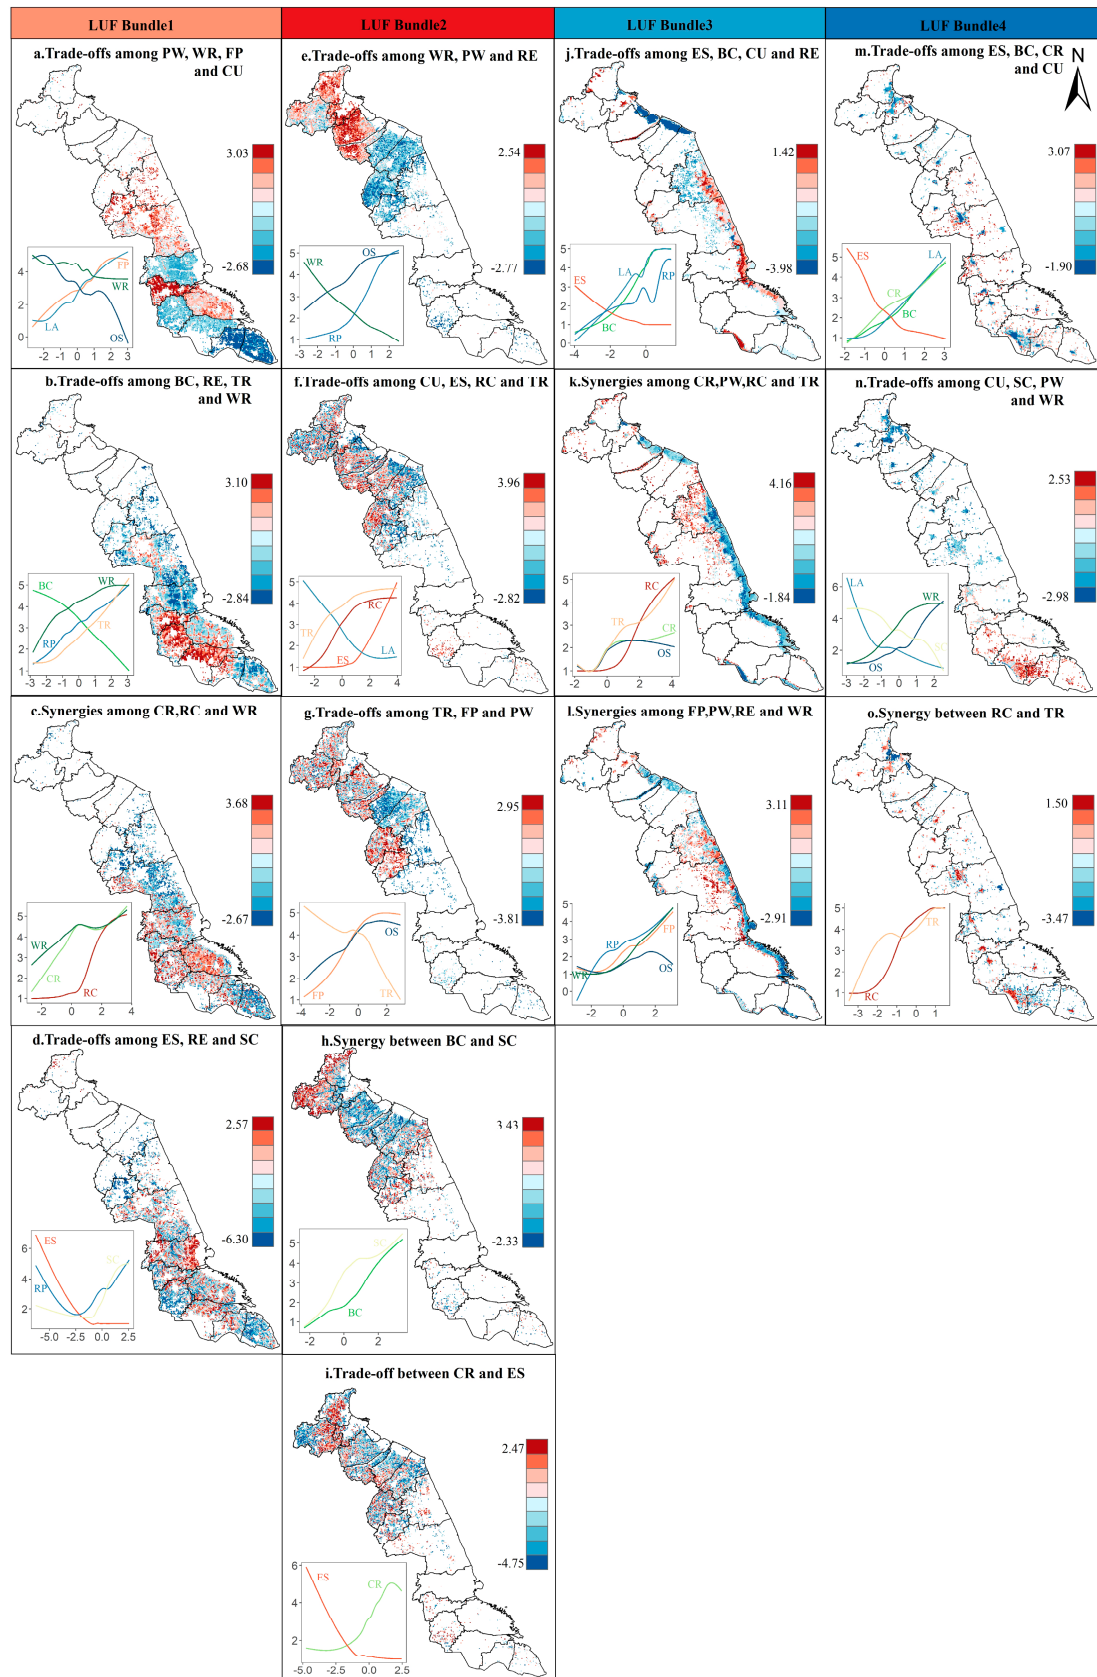

Figure S3. Spatial variations in factor scores of trade-offs and synergies among multiple provided functions in four bundles (2000, 2010). The inset shows the responses of the sub-function to the factor score, and the nonlinear curves between them are fitted by GAM. As

for the trade-offs among bundled functions, blue areas indicate high values in positive factors and low values in negative factors; red areas indicate low values in positive factors and high values in negative factors. Regarding the synergies among bundled functions, blue areas indicate that the values of all factors are high, while red areas indicate that all these functions have low values.

## Reference

- Cai, C.F., Ding, S.W., Shi, Z.H., Huang, L., Zhang, G.Y., 2000. Study of applying USLE and geographical information system IDRISI to predict soil erosion in small watershed. *J Soil Water Conserv.* 14(2), 19-24. <https://doi.org/10.13870/j.cnki.stbcbx.2000.02.005>.
- Chen, D., Li, J., Yang, X., Liu, Y., 2018. Trade-offs and optimization among ecosystem services in the Weihe River basin. *Acta Ecol.Sin.* 38(09), 272-283. <https://doi.org/10.5846/stxb201707011187>.
- Chu, L., Huang, C., Liu, Q., Liu, G.H., 2015. Changes of coastal zone landscape spatial patterns and ecological quality in Liaoning Province from 2000 to 2010. *Resour Sci.* 37(10), 1962-1972.
- Costanza, R., d'Arge, R., de Groot, R., Farber, S., Grasso, M., Hannon, B., Limburg, K., Naeem, S., O'Neill, R.V., Paruelo, J., Raskin, R.G., Sutton, P., van den Belt, M., 1997. The value of the world's ecosystem services and natural capital. *Nature.* 387(6630), 253-260. <https://doi.org/10.1038/387253a0>.
- Fan, Y., Jin, X., Gan, L., Jessup, L.H., Pijanowski, B.C., Yang, X., Xiang, X., Zhou, Y., 2018. Spatial identification and dynamic analysis of land use functions reveals distinct zones of multiple functions in eastern China. *Sci. Total Environ.* 642, 33-44. <https://doi.org/10.1016/j.scitotenv.2018.05.383>.
- Fu, B., Xu, P., Wang, Y., Peng, Y., Ren, J., 2013. Spatial Pattern of Water Retention in Dujiangyan County. *Acta Ecol.Sin.* 33(003), 789-797. <https://doi.org/10.5846/stxb201203260410>.
- Graves, R.A., Pearson, S.M., Turner, M.G., 2017. Species richness alone does not predict cultural ecosystem service value. *Proc Natl Acad Sci USA.* 114(14), 3774-3779. <https://doi.org/10.1073/pnas.1701370114>.
- Gu, J., Li, Y., Du, W., 2018. Evaluation on water source conservation capacity and analysis of its variation characteristics of Taihu Lake Basin based on InVEST model. *Water Resources Protection.* 34(3), 62-67. <https://doi.org/10.3880/j.issn.1004-6933.2018.03.10>.
- Henderson, J.V., Storeygard, A., Weil, D.N., 2012. Measuring Economic Growth from Outer Space. *Am. Econ. Rev.* 102(2), 994-1028. <https://doi.org/10.1257/aer.102.2.994>.
- Hu, G., Song, H., Shi, X., Zhang, M., Liu, X., Zhang, X., 2018. Soil Erosion Characteristics Based on RUSLE in the Wohushan Reservoir Watershed. *Sci. Geogr. Sin.* 38(4), 610-617. <https://doi.org/10.13249/j.cnki.sgs.2018.04.015>.
- Jin, C., Lu, Y., Zhang, L., Xu, J., 2009. An analysis of accessibility of scenic spots based on land traffic network: A case study of Nanjing. *Geogr Res-aust.* 28(1), 246-258. [https://doi.org/10.1016/S1874-8651\(10\)60080-4](https://doi.org/10.1016/S1874-8651(10)60080-4).
- Liu, C., Xu, Y., Huang, A., Liu, Y., Wang, H., Lu, L., Sun, P., Zheng, W., 2018. Spatial identification of land use multifunctionality at grid scale in farming-pastoral area: A case study of Zhangjiakou City, China. *Habitat Int.* 76, 48-61. <https://doi.org/10.1016/j.habitatint.2018.05.010>.
- Pan, J., Li, J., Cong, Y., 2015. Quantitative Geography Analysis on Spatial Structure of A-grade

Tourist Attractions in China. *Journal of Resources and Ecology*. 6(1), 12-20. <https://doi.org/10.5814/j.issn.1674-764x.2015.01.002>.

Peng, J., Liu, Y., Liu, Z., Yang, Y., 2017. Mapping spatial non-stationarity of human-natural factors associated with agricultural landscape multifunctionality in Beijing–Tianjin–Hebei region, China. *Agric. Ecosyst. Environ.* 246, 221-233. <https://doi.org/10.1016/j.agee.2017.06.007>.

Peng, J., Yang, Y., Liu, Y., Hu, Y.N., Du, Y., Meersmans, J., Qiu, S., 2018. Linking ecosystem services and circuit theory to identify ecological security patterns. *Sci. Total Environ.* 644, 781-790. <https://doi.org/10.1016/j.scitotenv.2018.06.292>.

Ran, Y., Li, X., Lu, L., 2010. Land Cover Products of China. *in* Lanzhou, C.a.A.R.S.D.C.a., editor. <https://doi.org/10.3972/westdc.007.2013.db>.

Sallustio, L., De Toni, A., Strollo, A., Di Febbraro, M., Gissi, E., Casella, L., Geneletti, D., Munafò, M., Vizzarri, M., Marchetti, M., 2017. Assessing habitat quality in relation to the spatial distribution of protected areas in Italy. *J. Environ. Manage.* 201(oct.1), 129. <https://doi.org/10.1016/j.jenvman.2017.06.031>.

Sharp, R., Chaplin-Kramer, R., Wood, S., Guerry, A., Tallis, H., Ricketts, T., Nelson, E., Ennaanay, D., Wolny, S., Olwero, N., Vigerstol, K., Pennington, D., Mendoza, G., Aukema, J., Foster, J., Forrest, J., Cameron, D.R., Arkema, K., Lonsdorf, E., Douglass, J., 2018. InVEST User's Guide. <https://doi.org/10.13140/RG.2.2.32693.78567>.

Shen, J., Li, S., Liang, Z., Liu, L., Li, D., Wu, S., 2020. Exploring the heterogeneity and nonlinearity of trade-offs and synergies among ecosystem services bundles in the Beijing-Tianjin-Hebei urban agglomeration. *Ecosyst. Serv.* 43, 101103. <https://doi.org/10.1016/j.ecoser.2020.101103>.

Sun, X., Jiang, Z., Liu, F., Zhang, D., 2019. Monitoring spatio-temporal dynamics of habitat quality in Nansihu Lake basin, eastern China, from 1980 to 2015. *Ecol. Ind.* 102c(JUL.), 716-723. <https://doi.org/10.1016/j.ecolind.2019.03.041>.

Wang, Q., Yue, T., Fan, Z., Sun, X., Xin, X., 2011. Spatial-temporal patterns of food provision in Jiangxi province. *Prog. Geogr.* 30(04), 479-484. <https://doi.org/10.3724/SP.J.1011.2011.00415>.

Williams, J.R., 1990. EPIC-erosion/productivity impact calculator: 1. Model documentation. Technical Bulletin - United States Department of Agriculture. 4(4), 206-207. <https://doi.org/10.1001/jama.284.24.3187>.

Wischmeier, W., Smith, D., 1978. Predicting Rainfall Erosion Losses — A Guide To Conservation Planning. Agriculture Handbooks (USA), No. 537. 537, 62 pp.

Wu, J., Cao, Q., Shi, S., Huang, X., Lu, Z., 2015. Spatio-temporal variability of habitat quality in Beijing-Tianjin-Hebei Area based on land use change. *J. Appl. Ecol.* 26(11), 3457-3466. <https://doi.org/10.13287/j.1001-9332.20150915.008>.

Xie, G., Zhang, C., Zhang, L., Zhang, W., Li, S., 2015. Improvement of the Evaluation Method for Ecosystem Service Value Based on Per Unit Area. *Journal of Natural Resources*. 30(08), 1243-1254. <https://doi.org/10.11849/zrzyxb.2015.08.001>.

Xu, S., Liu, Y., Wang, X., Zhang, G., 2017. Scale effect on spatial patterns of ecosystem services and associations among them in semi-arid area: A case study in Ningxia Hui Autonomous Region, China. *Sci. Total Environ.* 598, 297-306. <https://doi.org/10.1016/j.scitotenv.2017.04.009>.

Xu, X., 2018. Dataset of river basins and river networks in China based on DEM extraction. *in* Sciences, D.R.a.P.S.o.t.R.a.E.S.D.C.o.t.C.A.o., editor. <https://doi.org/10.12078/2018060101>.

Xu, X., Liu, J., Zhang, S., Li, R., Yan, C., Wu, S., 2018. Remote Sensing Monitoring Data Set of

Land Use and Land Cover in China in Multiple Periods (CNLUCC). *in* Sciences(<http://www.resdc.cn/DOI>), D.R.a.P.S.o.t.R.a.E.S.D.C.o.t.C.A.o., editor. <https://doi.org/10.12078/2018070201>.

Yang, Y., 2005. China Food Composition 2004. Beijing: Peking University Medical Press.

Yu, M., Yang, Y., Chen, F., Zhu, F., Qu, J., Zhang, S., 2019. Response of agricultural multifunctionality to farmland loss under rapidly urbanizing processes in Yangtze River Delta, China. *Sci. Total Environ.* 666, 1-11. <https://doi.org/10.1016/j.scitotenv.2019.02.226>.

Zhang, S., Bai, X., Wang, S., Qin, L., Tian, Y., Luo, G., Li, Y., 2014. Ecosystem services evaluation of typical rocky desertification areas based on InVEST model — A case study at Qinglong Country, Guizhou Province. *Journal of Earth Environment*. <https://doi.org/10.7515/JEE201405004>.

Zhang, Y., Long, H., Tu, S., Ge, D., Ma, L., 2019. Spatial identification of land use functions and their tradeoffs/synergies in China: Implications for sustainable land management. *Ecol. Ind.* 107. <https://doi.org/10.1016/j.ecolind.2019.105550>.

Zhou, W., Liu, G., Pan, J., Feng, X., 2005. Distribution of available soil water capacity in China. *J. Geogr. Sci.* 15(1), p.3-12. <https://doi.org/10.1007/BF02873101>.
